# Supplementary material for: Genetic, molecular and physiological basis of variation in Drosophila gut immunocompetence
Source: PubMed Central journal article supplement (PMC4525169; doi:10.1038/ncomms8829), 2015-07-27
Supplement: ncomms8829-s1.pdf [file ncomms8829-s1.pdf]

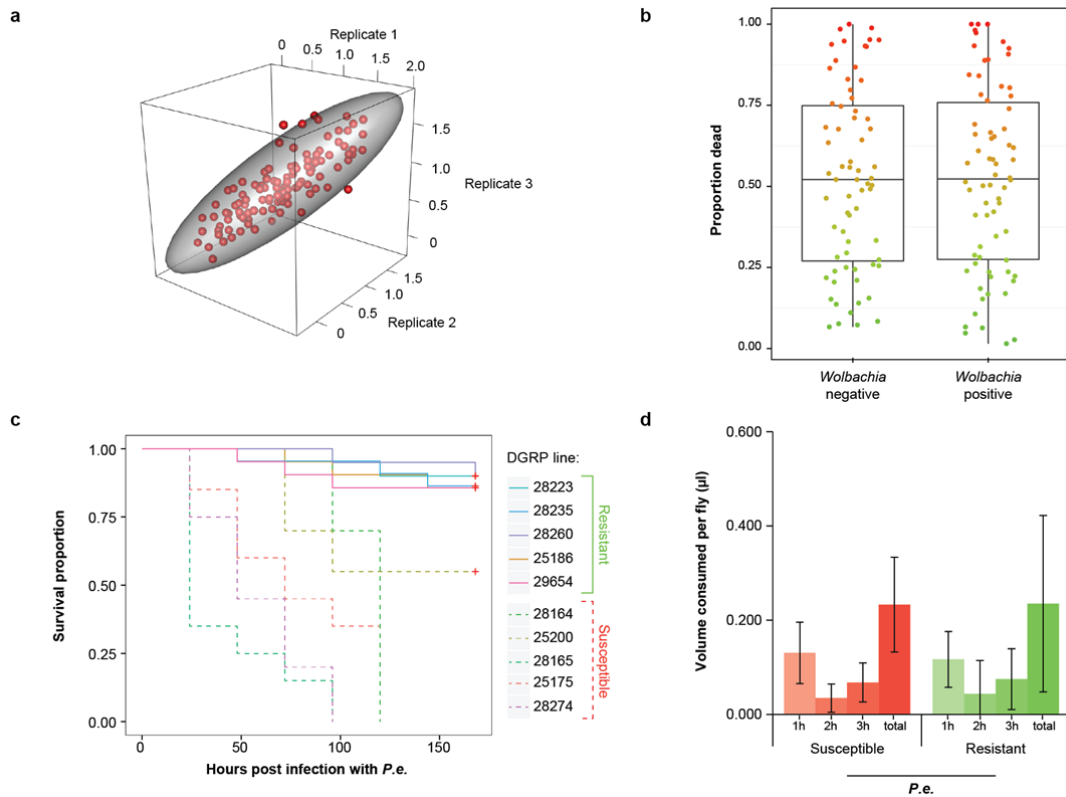

**Supplementary Figure 1. Feeding behaviour, *Wolbachia*, and microbiota do not have a major influence on susceptibility to enteric infection.** (a) The three survival experiment repeats represented in a three-dimensional scatter plot showing proportion deaths (after angular transformation) three days post infection. Each red point is a DGRP line and the confidence ellipsoid is in grey. (b) *Wolbachia* infection status does not correlate with susceptibility (Nested ANOVA  $p=0.51$  for *Wolbachia* status effect on survival). 68 lines and 70 lines are *Wolbachia* negative and positive, respectively. (c) Flies that were either resistant or susceptible to enteric infection in non-axenic conditions were infected with *P.e.* under axenic conditions. Absence of the endogenous intestinal microbiota does not alter the relative susceptibility of the DGRP flies. (d) A Capillary Feeder (CAFE) assay shows that susceptible and resistant DGRP flies ingest a comparable volume of bacteria during the first three hours post *P.e.* infection.

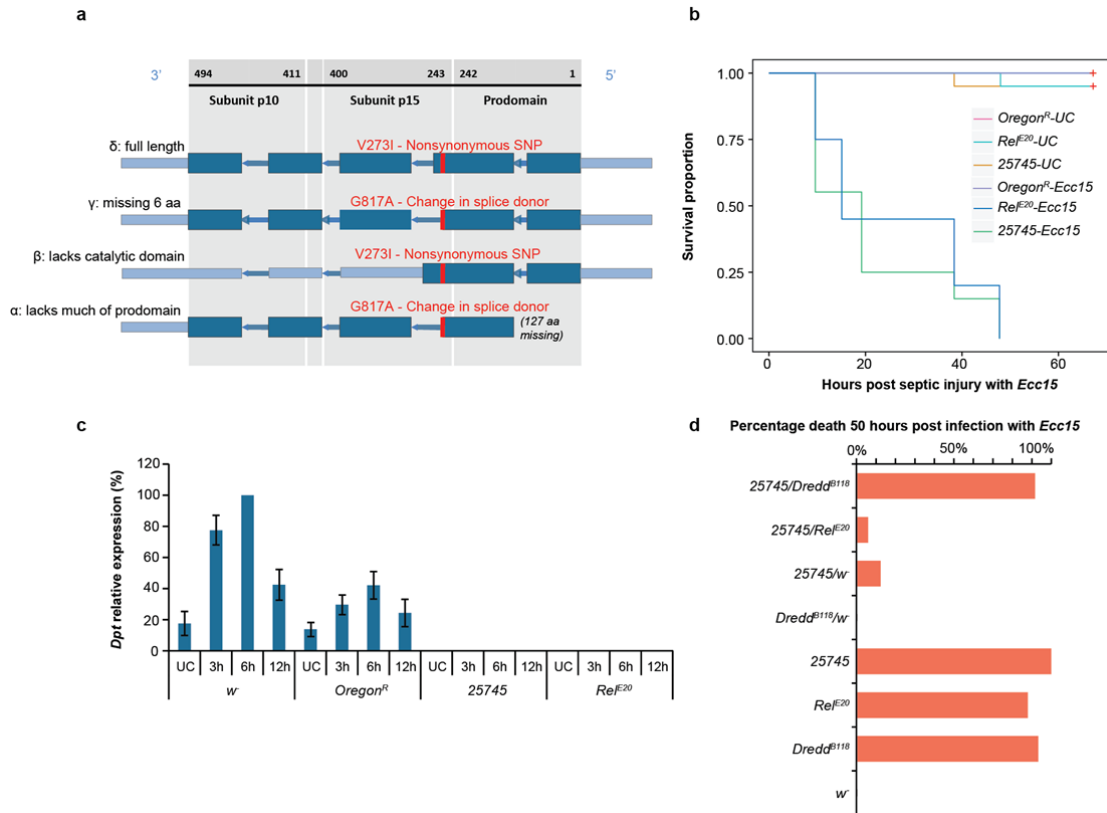

**Supplementary Figure 2. Identification of a loss of function mutation in the *dredd* locus in one DGRP line.** (a) Four isoforms related to the *dredd* gene have been previously described in <sup>1</sup>.  $\gamma$  and  $\delta$  isoforms differ only by six amino acids. The  $\alpha$  isoform lacks much of its prodomain and the  $\beta$  isoform lacks its catalytic domain. One SNP has been identified in the *dredd* locus of the DGRP line #25745, causing a change in the splicing donor site (G817A) in the  $\alpha$  and  $\gamma$  mRNA, or an amino acid change (V273I) in  $\delta$  and  $\beta$  isoforms. The light blue colours represent non-coding regions, the dark blue ones depict exons. (b) Survival analysis of females systemically infected with *Ecc15* shows a lower survival rate of the #25745 line and *relish* mutant (*Rel*<sup>E20</sup>) compared to controls (Log-Rank test  $p < 0.05$ ). (c) RT-qPCR experiments show that, similar to *relish* mutants, the #25745 line systemically infected with *Ecc15* has no detectable *dipterizin* (*Dpt*) expression as shown in *w* and Oregon<sup>R</sup> control flies. Data is normalized to 100%  $\pm$  S.D. *w*-flies consistently had the highest level of *Dpt* induction (100%), hence the missing error bar. (d) Percentage of dead female flies 50 hours post *Ecc15* systemic infection is monitored. Only complementation of #25745 line with a *dredd* mutant line fails to restore the wild-type survival, revealing that the identified SNP in the *dredd* gene is the causal locus of susceptibility to bacterial infection. Data presented in b and c are derived from three independent replicates.

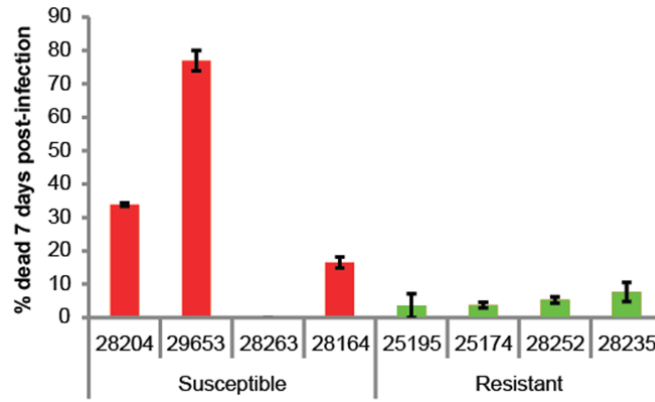

**Supplementary Figure 3. Lines resistant to *P. entomophila* are also resistant to a clinical isolate of *Pseudomonas aeruginosa*.** Bar chart showing the proportion of dead flies after 7 days post-infection ( $\pm$  s.d.; three biological replicates). The lines in the susceptible and resistant classes were identified based on their susceptibility to *P. entomophila* oral infection.

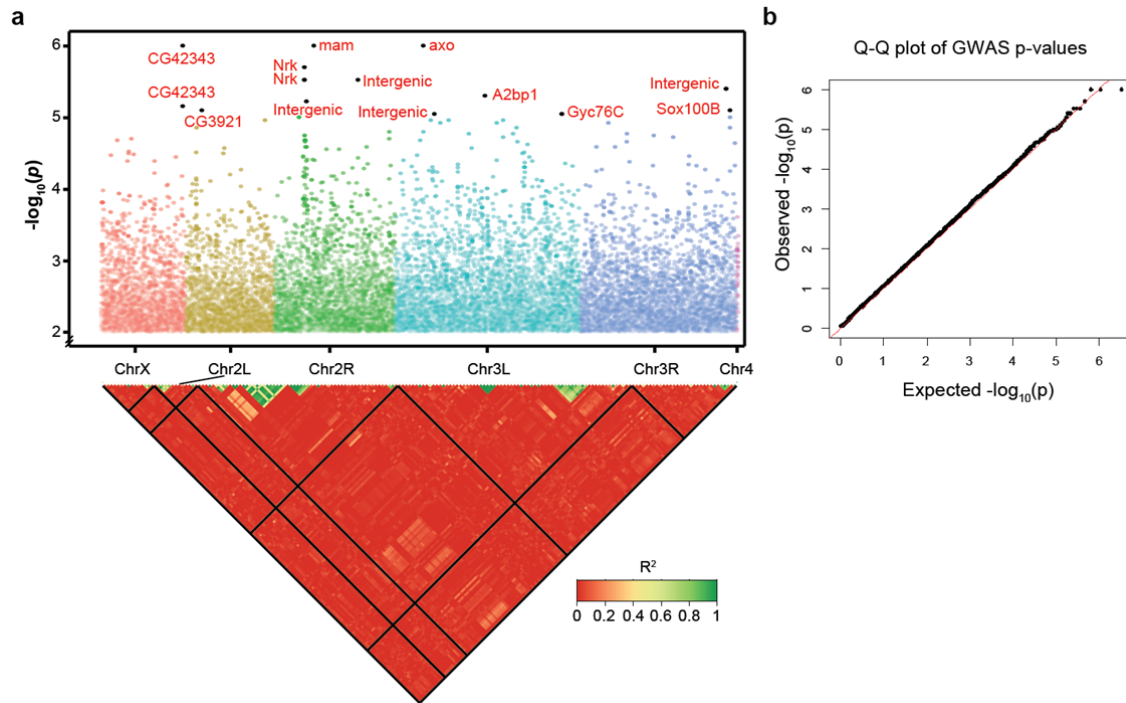

**Supplementary Figure 4. Different statistical approaches yield highly similar GWAS top hits.**

(a) **Above:** Manhattan plot of the  $p$ -values (y-axis) for the association between genomic variants in DGRP lines and *P.e.* susceptibility. The x-axis represents the genomic location. A linear model was implemented in PLINK using angular-transformed proportion death at day 3 as phenotype. **Below:** heatmap of pairwise LD between all SNPs with a  $p$ -value  $< 10^{-4}$  (n=188). (b) Q-Q plot of the linear association.

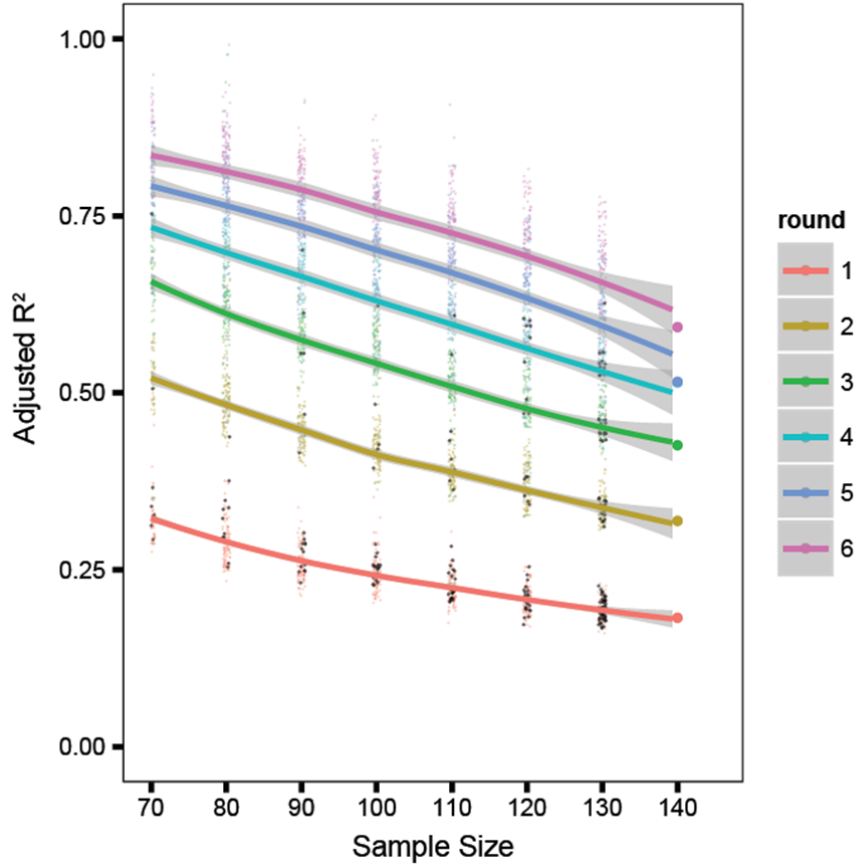

**Supplementary Figure 5. Illustration of the Beavis effect.** A plot of the adjusted  $R^2$  values obtained through random sampling of lines with different sample sizes (100 random samples per size group) and multi-SNP association (six rounds of association). The curves are loess fits with 95% confidence interval, and black points correspond to SNPs that have been identified in the full population.

**a**

|                                             | UAS-RNAi | GWAS $p$ -value | Dpt-LacZ induction |
|---------------------------------------------|----------|-----------------|--------------------|
| tub-GAL80 <sup>ts</sup> ; da-Gal4, Dpt-lacZ | Nrk      | 3.60E-06        | -                  |
|                                             | cv-c     | 7.28E-06        | ++                 |
|                                             | CG10147  | 7.32E-06        | +                  |
|                                             | mam      | 9.10E-06        | -                  |
|                                             | 5-HT1A   | 1.85E-05        | ++                 |
|                                             | Gyc76C   | 1.86E-05        | -                  |
|                                             | control  | -               | +                  |

**b**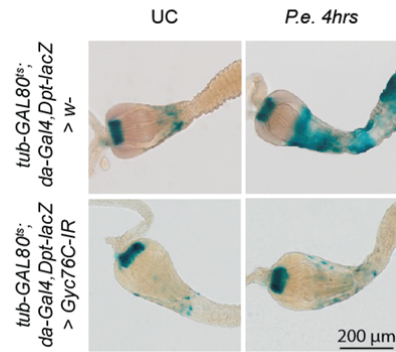

**Supplementary Figure 6. Validation of candidate genes.** (a) UAS-RNAi lines screened for an effect of *dpt-LacZ* reporter induction under a ubiquitous driver (*da-gal4*). “+” and “-” indicate higher and lower induction than control (*w<sup>1118</sup>*), respectively, and the number of +’s scales with the extent of induction. (b) Knock-down of the top GWAS candidate gene, *Gyc76C*, using *da-gal4* highly reduces the induction of the immune activation reporter *Dpt-lacZ* in the gut as revealed with X-Gal staining.

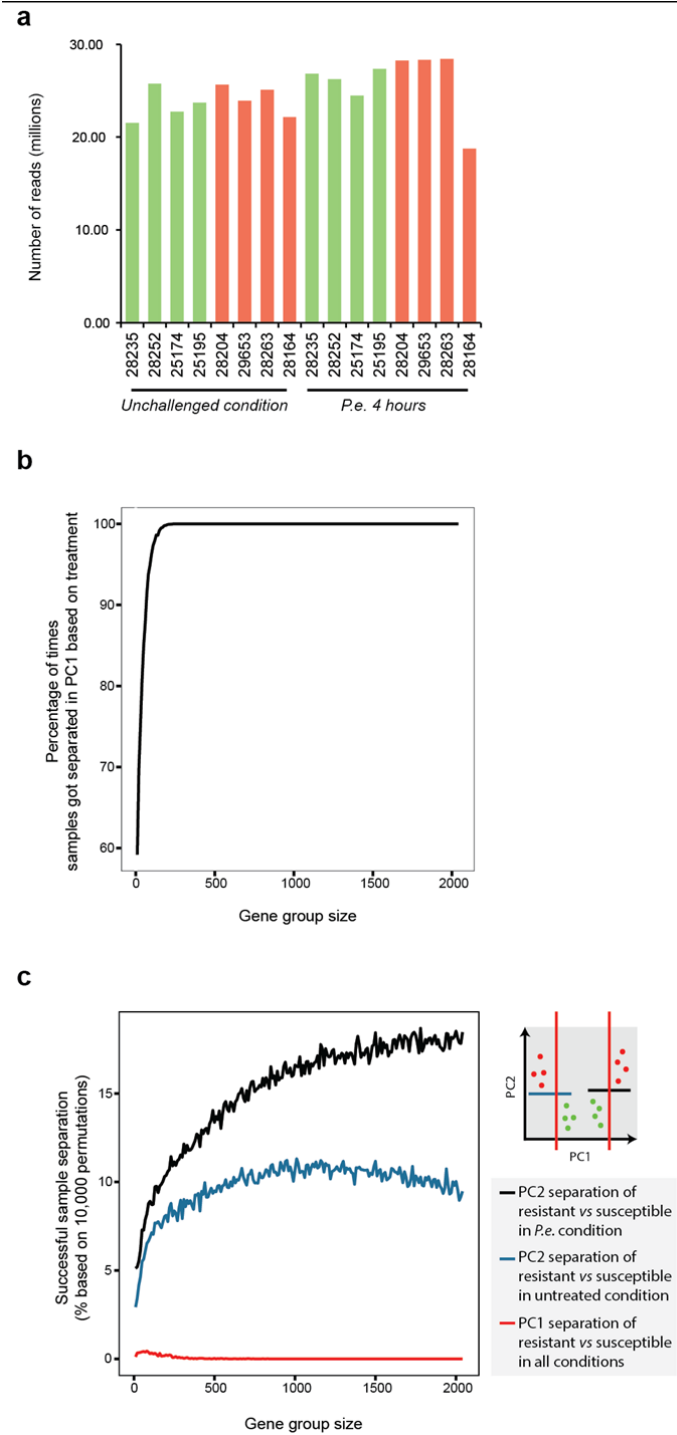

**Supplementary Figure 7. Permutations of random sampling followed by PCA of the RNA-seq data.** (a) RNA-seq library sizes of the 16 samples used in the study. (b) Random sampling of gene groups with sizes ranging from 10 to 2000 (10,000 permutations per group size), followed by PCA analysis on their gene expression levels revealed that treated and untreated samples are always separated by the first PC for groups greater than 250. (c) The same random sampling and PCA as in b, but with different separation criteria (see legend).

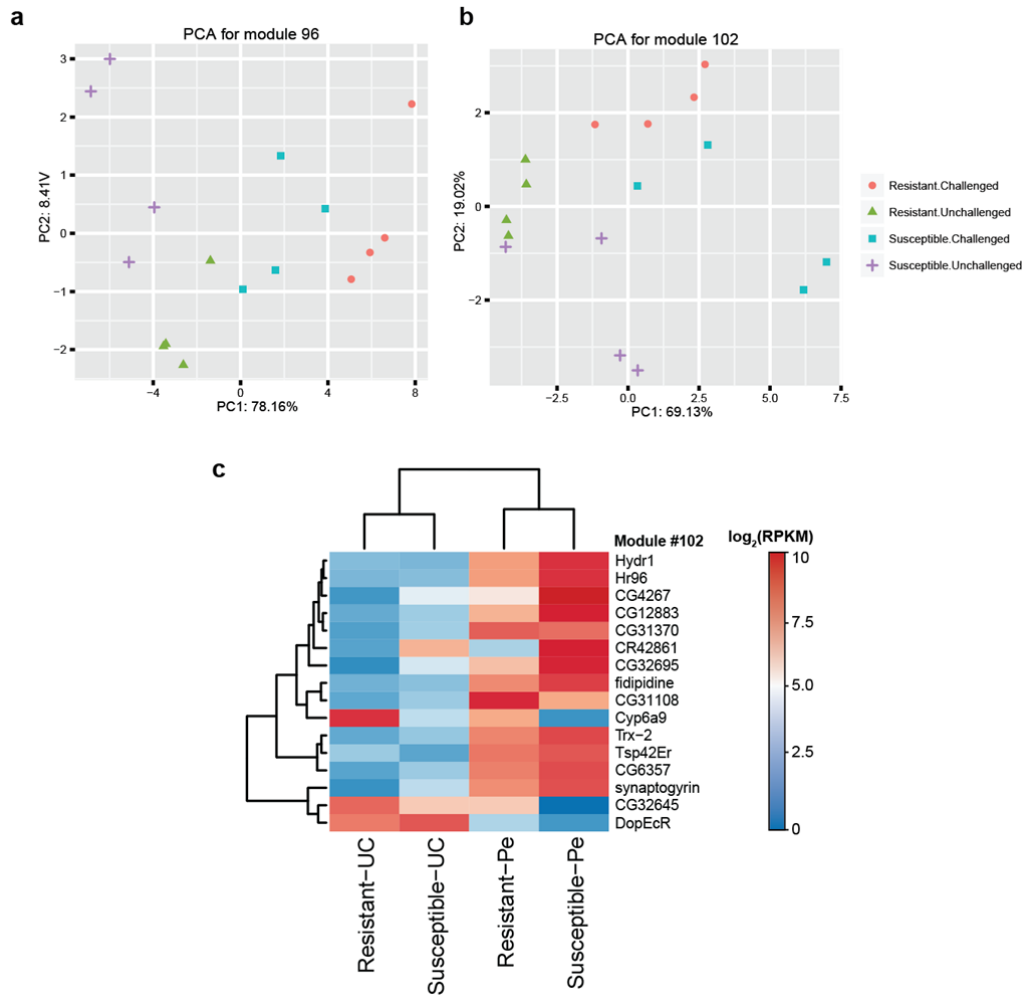

**Supplementary Figure 8. Principal component analysis of modules (a):#96 and (b)#102. (c)** Heatmap of average expression levels of genes in module #102 by susceptibility/treatment (unchallenged = UC or infected = Pe) class.



**Supplementary Table 1.** Percentage death of tested DGRP lines 3 days post-infection with *Pseudomonas entomophila*

| <b>DGRP#</b> | <b>Bloomington<br/>stock number</b> | <b>Percentage dead at day 3</b> |
|--------------|-------------------------------------|---------------------------------|
| DGRP-897     | 28260                               | 0.50%                           |
| DGRP-802     | 28235                               | 1.80%                           |
| DGRP-320     | 29654                               | 4.30%                           |
| DGRP-738     | 28223                               | 4.80%                           |
| DGRP-208     | 25174                               | 7.60%                           |
| DGRP-857     | 28252                               | 4.50%                           |
| DGRP-486     | 25195                               | 10.00%                          |
| DGRP-129     | 28141                               | 7.20%                           |
| DGRP-313     | 25180                               | 7.20%                           |
| DGRP-360     | 25186                               | 2.40%                           |
| DGRP-303     | 25176                               | 10.50%                          |
| DGRP-142     | 28144                               | 9.70%                           |
| DGRP-907     | 28262                               | 15.00%                          |
| DGRP-217     | 28154                               | 12.70%                          |
| DGRP-801     | 28234                               | 16.30%                          |
| DGRP-379     | 25189                               | 20.80%                          |
| DGRP-158     | 28147                               | 24.40%                          |
| DGRP-237     | 28160                               | 16.60%                          |
| DGRP-441     | 28198                               | 16.90%                          |
| DGRP-440     | 28197                               | 22.00%                          |
| DGRP-426     | 28196                               | 11.70%                          |
| DGRP-399     | 25192                               | 24.70%                          |
| DGRP-321     | 29655                               | 23.10%                          |
| DGRP-894     | 28259                               | 23.10%                          |
| DGRP-45      | 28128                               | 20.30%                          |
| DGRP-335     | 25183                               | 20.70%                          |
| DGRP-307     | 25179                               | 25.20%                          |
| DGRP-837     | 28246                               | 27.20%                          |
| DGRP-91      | 28136                               | 21.50%                          |
| DGRP-161     | 28148                               | 25.80%                          |
| DGRP-705     | 25744                               | 35.50%                          |
| DGRP-377     | 28186                               | 29.30%                          |
| DGRP-822     | 28244                               | 22.00%                          |
| DGRP-804     | 28236                               | 30.90%                          |
| DGRP-861     | 28253                               | 21.80%                          |
| DGRP-799     | 25207                               | 32.70%                          |
| DGRP-812     | 28240                               | 37.40%                          |
| DGRP-356     | 28178                               | 23.10%                          |
| DGRP-370     | 28182                               | 27.90%                          |
| DGRP-373     | 28184                               | 40.80%                          |
| DGRP-437     | 25194                               | 33.50%                          |
| DGRP-195     | 28153                               | 26.30%                          |
| DGRP-406     | 29657                               | 24.10%                          |
| DGRP-318     | 28168                               | 45.00%                          |
| DGRP-136     | 28142                               | 34.30%                          |
| DGRP-41      | 28126                               | 42.70%                          |
| DGRP-461     | 28200                               | 27.70%                          |
| DGRP-805     | 28237                               | 25.70%                          |
| DGRP-517     | 25197                               | 46.70%                          |
| DGRP-563     | 28211                               | 46.10%                          |
| DGRP-352     | 28177                               | 53.60%                          |
| DGRP-75      | 28132                               | 51.40%                          |
| DGRP-315     | 25181                               | 50.40%                          |
| DGRP-642     | 28216                               | 49.30%                          |
| DGRP-737     | 28222                               | 50.10%                          |
| DGRP-371     | 28183                               | 56.30%                          |
| DGRP-391     | 25191                               | 48.80%                          |
| DGRP-859     | 25210                               | 41.90%                          |
| DGRP-256     | 28162                               | 44.90%                          |
| DGRP-42      | 28127                               | 51.00%                          |
| DGRP-855     | 28251                               | 48.90%                          |
| DGRP-362     | 25187                               | 44.50%                          |

|          |       |        |
|----------|-------|--------|
| DGRP-884 | 28256 | 52.00% |
| DGRP-350 | 28176 | 52.20% |
| DGRP-513 | 29659 | 41.00% |
| DGRP-808 | 28238 | 33.30% |
| DGRP-177 | 28150 | 52.70% |
| DGRP-786 | 25206 | 57.30% |
| DGRP-783 | 28230 | 49.70% |
| DGRP-375 | 25188 | 52.60% |
| DGRP-374 | 28185 | 63.00% |
| DGRP-381 | 28188 | 55.00% |
| DGRP-508 | 28205 | 54.10% |
| DGRP-820 | 25208 | 63.30% |
| DGRP-832 | 28245 | 52.60% |
| DGRP-57  | 29652 | 55.90% |
| DGRP-83  | 28134 | 68.30% |
| DGRP-492 | 28203 | 41.60% |
| DGRP-589 | 28213 | 40.90% |
| DGRP-239 | 28161 | 57.70% |
| DGRP-309 | 28166 | 68.20% |
| DGRP-796 | 28233 | 65.00% |
| DGRP-427 | 25193 | 71.10% |
| DGRP-304 | 25177 | 70.40% |
| DGRP-555 | 25198 | 72.10% |
| DGRP-26  | 28123 | 72.90% |
| DGRP-324 | 25182 | 57.30% |
| DGRP-491 | 28202 | 77.30% |
| DGRP-310 | 28276 | 50.40% |
| DGRP-712 | 25201 | 64.90% |
| DGRP-892 | 28258 | 57.40% |
| DGRP-380 | 25190 | 77.70% |
| DGRP-332 | 28171 | 15.20% |
| DGRP-409 | 28278 | 59.50% |
| DGRP-595 | 28215 | 82.80% |
| DGRP-776 | 28229 | 68.40% |
| DGRP-338 | 28173 | 59.20% |
| DGRP-392 | 28194 | 77.60% |
| DGRP-181 | 28151 | 58.60% |
| DGRP-509 | 28206 | 63.90% |
| DGRP-730 | 25202 | 80.20% |
| DGRP-732 | 25203 | 82.90% |
| DGRP-233 | 28159 | 77.70% |
| DGRP-109 | 28140 | 87.00% |
| DGRP-176 | 28149 | 85.10% |
| DGRP-911 | 28264 | 68.80% |
| DGRP-358 | 25185 | 88.10% |
| DGRP-365 | 25445 | 80.70% |
| DGRP-879 | 28254 | 79.20% |
| DGRP-28  | 28124 | 86.80% |
| DGRP-359 | 28179 | 95.30% |
| DGRP-531 | 28207 | 67.80% |
| DGRP-790 | 28232 | 77.90% |
| DGRP-502 | 28204 | 94.90% |
| DGRP-228 | 28157 | 88.80% |
| DGRP-405 | 29656 | 93.80% |
| DGRP-153 | 28146 | 84.40% |
| DGRP-639 | 25199 | 96.60% |
| DGRP-818 | 28241 | 93.00% |
| DGRP-882 | 28255 | 95.70% |
| DGRP-714 | 25745 | 98.30% |
| DGRP-535 | 28208 | 98.20% |
| DGRP-38  | 28125 | 89.40% |
| DGRP-386 | 28192 | 96.00% |
| DGRP-890 | 28257 | 93.40% |
| DGRP-761 | 28227 | 66.80% |
| DGRP-138 | 28143 | 80.50% |
| DGRP-721 | 28220 | 93.60% |
| DGRP-101 | 28138 | 96.80% |
| DGRP-40  | 29651 | 99.40% |
| DGRP-229 | 29653 | 99.50% |
| DGRP-908 | 28263 | 99.60% |

|          |       |         |
|----------|-------|---------|
| DGRP-280 | 28164 | 100.00% |
| DGRP-287 | 28165 | 100.00% |
| DGRP-301 | 25175 | 100.00% |
| DGRP-85  | 28274 | 100.00% |
| DGRP-227 | 28156 | 65.80%  |
| DGRP-707 | 25200 | 100.00% |
| DGRP-765 | 25204 | 64.40%  |
| DGRP-774 | 25205 | 93.50%  |

**Supplementary Table 2.** Analyses of variance for diallel survival data (after angular transformation).

| Effect                                                                | df | Mean Square | F       | P       |
|-----------------------------------------------------------------------|----|-------------|---------|---------|
| ANOVA on male/female effects due to resistant/susceptibility category |    |             |         |         |
| Male resistance category                                              | 1  | 5.477       | 271.819 | <0.001  |
| Female resistance category                                            | 1  | 2.266       | 38.159  | 0.001   |
| Male strain (nested within category)                                  | 6  | .020        | .275    | 0.946   |
| Female strain (nested within category)                                | 6  | .060        | .807    | 0.570   |
| Male category x Female category                                       | 1  | .814        | 11.025  | 0.002   |
| Male strain x Female strain                                           | 46 | .075        | 2.813   | <0.001  |
| Replication                                                           | 63 | 1.715       | 64.183  | <0.001  |
| Diallel ANOVA testing for general and specific combining ability      |    |             |         |         |
| General combining ability                                             | 7  | 0.264       | 6.682   | <0.001  |
| Specific combining ability                                            | 28 | 0.215       | 5.444   | <0.001  |
| Reciprocal                                                            | 28 | 0.166       | 4.184   | <0.001  |
| Maternal                                                              | 7  | 0.13        | 0.735   | 0.64287 |
| Maternal interaction                                                  | 21 | 0.177       | 4.481   | <0.001  |
| Error                                                                 | 63 | 0.04        |         |         |

The first ANOVA tests for effects due to male/female strain and susceptibility class (susceptible or resistant) and their interactions on survival. Strain was nested within the resistant or susceptible categories and treated as a random variable. The second ANOVA represents the diallel analysis according to Griffing (1956)<sup>2</sup> testing for general combining ability (additive effects and their interactions) and specific combining ability (dominance effects and their interactions) as well as effects due to reciprocal differences in the crosses, maternal contributions, and their interactions.

Model for ANOVA:  $Y_{ijklm} = \mu + m_i + f_j + s_{k(i)} + t_{l(j)} + mf_j + s_{k(i)}t_{l(j)} + e_{ijklm}$  where  $\mu$  is the population mean,  $m_i$  is the  $i$ th male category,  $f_j$  is the  $j$ th female category,  $s_{k(i)}$  is the  $k$ th male strain within the male category,  $t_{l(j)}$  is the  $l$ th female strain within the female category and  $e_{ijklm}$  is the residual. Strain within categories are random, other terms apart from replication are fixed.

Model for diallel analysis:  $Y_{ijklm} = \mu + g_i(g_j) + s_{ij} + r_{ij} + m_i + n_{ij} + e_{ijk}$  where  $\mu$  is the population mean,  $g_i(g_j)$  is the general combining ability for the  $i$ th ( $j$ th) parents,  $s_{ij}$  is the special combining ability for the cross between the  $i$ th and  $j$ th parents,  $r_{ij}$  is the reciprocal effect,  $m_i$  is the maternal effect,  $n_{ij}$  is the interaction of the  $i$ th maternal effect with the  $j$ th parent, and  $e_{ijk}$  is the error term. The analysis follows Method 1 (parents and reciprocal F1s measured) under Model 1 of Griffing (1956)<sup>2</sup> with maternal terms added<sup>3,4</sup>.

**Supplementary Table 3.** Summary of top QTLs obtained in common between parametric and non-parametric association studies.

| Genomic location | Variant annotation                                   | Kruskal-Wallis p value <sup>a</sup> | PLINK empirical p-value <sup>b</sup> | Number of permutations <sup>c</sup> | R <sup>2</sup> <sup>d</sup> |
|------------------|------------------------------------------------------|-------------------------------------|--------------------------------------|-------------------------------------|-----------------------------|
| Chr2R:9048826    | Nrk (intron)                                         | 3.60E-06                            | 3.00E-06                             | 1000000                             | 0.14                        |
| Chr2R:9048897    | Nrk (exon V306G)                                     | 3.60E-06                            | 3.00E-06                             | 1000000                             | 0.14                        |
| Chr2R:9048840    | Nrk (intron)                                         | 4.40E-06                            | 2.00E-06                             | 1000000                             | 0.14                        |
| Chr3R:26527712   | Intergenic - Pka-C2(dist=4852),CG31010(dist=2770)    | 4.93E-06                            | 4.00E-06                             | 1000000                             | 0.15                        |
| Chr3R:26527703   | Intergenic - Pka-C2(dist=4843),CG31010(dist=2779)    | 4.93E-06                            | 4.00E-06                             | 1000000                             | 0.15                        |
| Chr2L:3172873    | Intergenic - CG34406(dist=123);CG31698(dist=411)     | 6.83E-06                            | 3.10E-05                             | 1000000                             | 0.12                        |
| Chr3R:10229978   | cv-c (intron)                                        | 7.28E-06                            | 1.70E-05                             | 1000000                             | 0.13                        |
| Chr3L:6480167    | CG10147 (exon, synonymous)                           | 7.32E-06                            | 1.20E-05                             | 1000000                             | 0.13                        |
| Chr2R:9892328    | mam (intron), CG30482 (exon)                         | 9.10E-06                            | 1.00E-06                             | 1000000                             | 0.16                        |
| Chr3L:6076155    | Intergenic - CG6619(dist=1520),CG13293(dist=4214)    | 1.35E-05                            | 5.85E-05                             | 752247                              | 0.11                        |
| Chr3R:10227723   | cv-c (intron)                                        | 1.36E-05                            | 2.20E-05                             | 1000000                             | 0.14                        |
| ChrX:21324090    | CG42343 (intron)                                     | 1.41E-05                            | 1.00E-06                             | 1000000                             | 0.19                        |
| Chr3L:9361423    | CG4452 (intron)                                      | 1.45E-05                            | 1.70E-05                             | 1000000                             | 0.12                        |
| Chr3L:10570926   | A2bp1 (intron)                                       | 1.55E-05                            | 5.00E-06                             | 1000000                             | 0.17                        |
| Chr2R:19991068   | enok (exon, synonymous)                              | 1.57E-05                            | 1.60E-05                             | 1000000                             | 0.10                        |
| Chr2R:14967476   | 5-HT1A (intron)                                      | 1.85E-05                            | 5.11E-05                             | 861138                              | 0.10                        |
| Chr3L:19769316   | CG42637,Gyc76C (intron)                              | 1.86E-05                            | 9.00E-06                             | 1000000                             | 0.15                        |
| ChrX:4208879     | mei-9 (3' UTR)                                       | 1.89E-05                            | 3.40E-05                             | 1000000                             | 0.10                        |
| Chr2L:3794426    | CG3921 (exon, synonymous)                            | 1.90E-05                            | 8.00E-06                             | 1000000                             | 0.15                        |
| Chr2R:10603181   | Intergenic - mspo(dist=2055),CG12865(dist=23043)     | 1.94E-05                            | 8.09E-05                             | 544000                              | 0.11                        |
| Chr2R:8613576    | CG42663 (intron)                                     | 2.76E-05                            | 1.00E-05                             | 1000000                             | 0.16                        |
| Chr2R:8613586    | CG42663 (intron)                                     | 4.34E-05                            | 1.00E-05                             | 1000000                             | 0.16                        |
| Chr2R:16288827   | Intergenic - CG11192(dist=46270),CG12484(dist=23014) | 5.18E-05                            | 3.00E-06                             | 1000000                             | 0.15                        |
| Chr3R:5045687    | pum (intron)                                         | 7.31E-05                            | 5.67E-05                             | 776000                              | 0.11                        |
| Chr2R:12715416   | CG34459(dist=1264), CG34460(dist=1013)               | 8.12E-05                            | 2.80E-05                             | 1000000                             | 0.08                        |
| ChrX:12947763    | CG12715 (exon, synonymous)                           | 9.30E-05                            | 1.48E-04                             | 298402                              | 0.10                        |
| Chr2L:8635001    | Sema-1a (intron)                                     | 2.25E-04                            | 2.70E-05                             | 1000000                             | 0.11                        |

<sup>a</sup> Non-parametric association p-value

<sup>b</sup> Empirical p-value after adaptive permutation as implemented in PLINK<sup>5</sup>

<sup>c</sup> Number of permutations performed for each SNP

<sup>d</sup> Linear model R<sup>2</sup> for single SNPs

**Supplementary Table 4.** Additive multiple-SNP model results

| <b>GWAS Round</b> | <b>Top SNP</b> | <b>Coefficient</b> | <b>p-value</b> | <b>Adjusted R<sup>2</sup></b> |
|-------------------|----------------|--------------------|----------------|-------------------------------|
| 1                 | Chr3L:4668479  | -0.3251            | 1.46E-07       | 0.18                          |
| 2                 | Chr2R:9892328  | -0.2683            | 5.64E-07       | 0.32                          |
| 3                 | Chr2L:3355610  | 0.4201             | 1.54E-06       | 0.43                          |
| 4                 | Chr3L:13828661 | -0.3401            | 1.90E-06       | 0.51                          |
| 5                 | Chr2L:3355661  | -0.4183            | 7.30E-07       | 0.52                          |
| 6                 | Chr2L:2836880  | 0.3875             | 1.84E-06       | 0.59                          |
| 7                 | Chr2L:2836903  | -0.3888            | 2.00E-06       | 0.58                          |
| 8                 | Chr3L:15759197 | -0.1970            | 5.79E-06       | 0.64                          |
| 9                 | Chr3R:15278253 | 0.1810             | 5.08E-06       | 0.69                          |
| 10                | Chr3R:15278255 | -0.1810            | 5.08E-06       | 0.69                          |
| 11                | Chr3L:9600645  | 0.1600             | 5.35E-06       | 0.74                          |
| 12                | Chr2L:12809795 | 0.1499             | 1.25E-05       | 0.78                          |
| 13                | Chr3L:9680631  | -0.1815            | 3.66E-06       | 0.83                          |
| 14                | Chr3R:9554355  | -0.1739            | 2.10E-06       | 0.87                          |
| 15                | Chr3R:9554381  | -0.1739            | 2.10E-06       | 0.87                          |
| 16                | Chr2L:18589931 | 0.1971             | 3.59E-05       | 0.90                          |
| 17                | Chr2R:10000342 | 0.1574             | 0.000117       | 0.91                          |
| 18                | Chr3L:3312435  | -0.1575            | 0.000171       | 0.93                          |
| 19                | Chr2R:16922817 | -0.1419            | 5.25E-05       | 0.94                          |
| 20                | ChrX:20010029  | -0.1835            | 4.19E-05       | 0.95                          |

Successive iterations of the GWAS were performed using a linear model of the form  $Y = \mu + \text{SNP}_1 + \text{SNP}_2 + \text{SNP}_3 + \dots + \text{SNP}_N + \epsilon$ , where  $\text{SNP}_1, \text{SNP}_2, \text{SNP}_3, \dots, \text{SNP}_N$ , are the most significant SNPs fitted in succession as in Harbison et al., 2013<sup>6</sup>. In short, for each round a GWAS is performed and the SNP with the most significant QTL is recorded, which is then incorporated in the linear model of the next round.

**Supplementary Table 5.** Multiple-SNP regression for SNPs in module #96

| <b>geneID</b> | <b>GWAS p-value</b> | <b>snpID</b>   | <b>Estimate</b> | <b>Std. Error</b> | <b>t</b> | <b>value</b> |
|---------------|---------------------|----------------|-----------------|-------------------|----------|--------------|
| -             | -                   | (Intercept)    | 0.33911         | 0.23743           | 1.428    | 0.15611      |
| eas           | 1.40E-03            | ChrX:16175381  | 0.13048         | 0.05661           | 2.305    | 0.02309      |
| rev7          | 6.54E-01            | Chr3R:1414703  | 0.13655         | 0.11685           | 1.169    | 0.24513      |
| CG33158       | 5.54E-05            | Chr3L:16415271 | -0.22319        | 0.06629           | -3.367   | 0.00105      |
| Cyp6d2        | 1.11E-02            | Chr2R:18540150 | -0.10239        | 0.08927           | -1.147   | 0.25393      |
| CG10827       | 5.38E-03            | Chr3R:16832600 | -0.10546        | 0.07278           | -1.449   | 0.15022      |
| CG32669       | 7.07E-02            | ChrX:10737211  | 0.06322         | 0.05821           | 1.086    | 0.27986      |
| Gs2           | 4.12E-02            | ChrX:11322919  | -0.0274         | 0.06418           | -0.427   | 0.67023      |
| CG3625        | 8.59E-03            | Chr2L:284365   | -0.23906        | 0.0887            | -2.695   | 0.00816      |
| GstD10        | 8.17E-02            | Chr3R:8191081  | -0.02762        | 0.06186           | -0.446   | 0.65618      |
| yip2          | 4.24E-02            | Chr2L:9915438  | 0.16849         | 0.12498           | 1.348    | 0.18044      |
| SMC2          | 9.89E-02            | Chr2R:10736815 | -0.13882        | 0.10309           | -1.347   | 0.18095      |
| lectin-37Da   | 1.71E-02            | Chr2L:19418365 | -0.14842        | 0.1091            | -1.36    | 0.17654      |
| Dgp-1         | 5.59E-02            | Chr2R:14057889 | 0.02383         | 0.10814           | 0.22     | 0.82603      |
| GstD9         | 1.25E-01            | Chr3R:8192383  | 0.20098         | 0.10987           | 1.829    | 0.07014      |
| Ugt36Ba       | 1.01E-01            | Chr2L:16794249 | 0.05927         | 0.06907           | 0.858    | 0.39268      |
| CG11309       | 4.37E-02            | Chr3L:21297350 | 0.08747         | 0.08353           | 1.047    | 0.29735      |
| GstD1         | 1.42E-01            | Chr3R:8194750  | 0.01066         | 0.1343            | 0.079    | 0.93691      |
| gukh          | 3.36E-03            | Chr3R:14827525 | 0.19141         | 0.09755           | 1.962    | 0.05233      |
| Sodh-2        | 3.97E-02            | Chr3R:6702928  | 0.06843         | 0.11717           | 0.584    | 0.56044      |
| RPA3          | 1.28E-01            | ChrX:11615178  | 0.06898         | 0.06521           | 1.058    | 0.29256      |

Residual standard error: 0.3029 on 108 degrees of freedom  
(11 observations deleted due to missingness)

Adjusted R-squared: 0.2961

F-statistic: 3.693 on 20 and 108 DF, p-value: 5.569e-06

One SNP with the lowest GWAS p-value in the GWAS was chosen for each of the 20 genes in the module. The 20 SNPs were fitted simultaneously in a linear model of the form  

$$Y = \mu + \text{SNP}_1 + \text{SNP}_2 + \text{SNP}_3 + \dots + \text{SNP}_{20} + \epsilon.$$

**Supplementary Table 6.** List of primer sequences used in the study

| Target            | Forward primer          | Reverse primer       |
|-------------------|-------------------------|----------------------|
| <i>diptericin</i> | ACCGCAGTACCCACTCAATC    | CACACCTTCTGGTGACCCTG |
| <i>RpL32</i>      | GACGCTTCAAGGGACAGTATCTG | AAACGCGGTTCTGCATGAG  |
| <i>Gyc76C</i>     | AAACATCGGATGAGCAGGCA    | GTGTAGTCGCAGCCACAGAT |
| <i>monalysin</i>  | CTGGGTAATGGCCGACAAGT    | ACAGAATGTGACGACCACCC |



## Supplementary References

1. Di Fruscio M, Styhler S, Wikholm E, Boulanger M-C, Lasko P, Richard S. *kep1* interacts genetically with *dredd/Caspase-8*, and *kep1* mutants alter the balance of *dredd* isoforms. *Proceedings of the National Academy of Sciences* **100**, 1814-1819 (2003).
2. Griffing B. Concept of General and Specific Combining Ability in Relation to Diallel Crossing Systems. *Australian Journal of Biological Sciences* **9**, 463-493 (1956).
3. Cockerham CC, Weir BS. Quadratic Analyses of Reciprocal Crosses. *Biometrics* **33**, 187-203 (1977).
4. Kaushik LS, Puri PD. A Study of Maternal and Maternal Interaction Effects in Diallel Crosses. *Biometrical Journal* **26**, 771-777 (1984).
5. Purcell S, *et al.* PLINK: A Tool Set for Whole-Genome Association and Population-Based Linkage Analyses. *American Journal of Human Genetics* **81**, 559-575 (2007).
6. Harbison S, McCoy L, Mackay T. Genome-wide association study of sleep in *Drosophila melanogaster*. *BMC Genomics* **14**, 281 (2013).
